# Supplementary material for: Indigenous knowledge and biodiversity conservation in forestry.
Source: MDPI journal article supplement (doi:10.3390/vetsci10070482), 1999-01-01
Supplement: s1 [file s1]

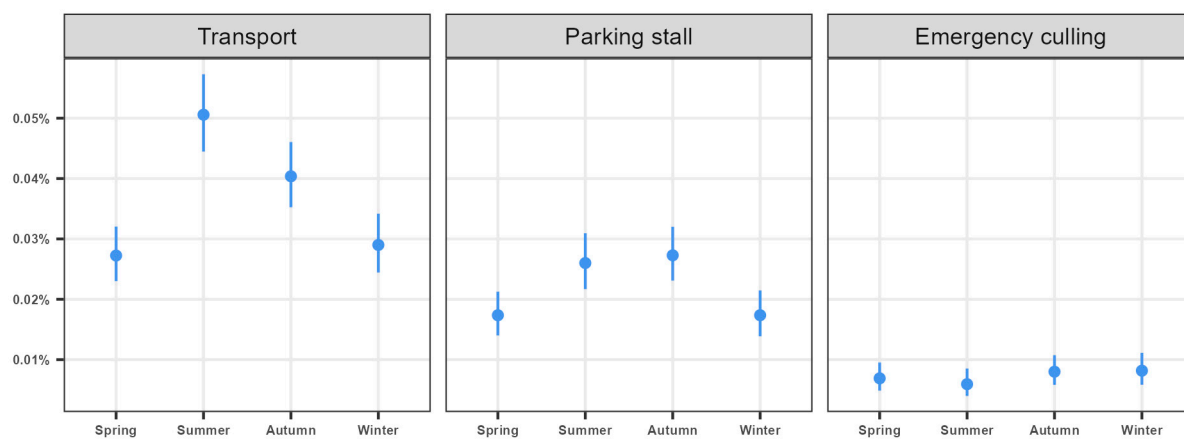

**Figure S1.**

Proportions with exact confidence interval about pigs unfit for slaughtering. Meteorological season were extracted from date of slaughtering and defined as follows: spring from March 1st to May 31, summer from June 1st to August 31st, autumn from September 1st to November 30st, winter from December 1st to February 28st.

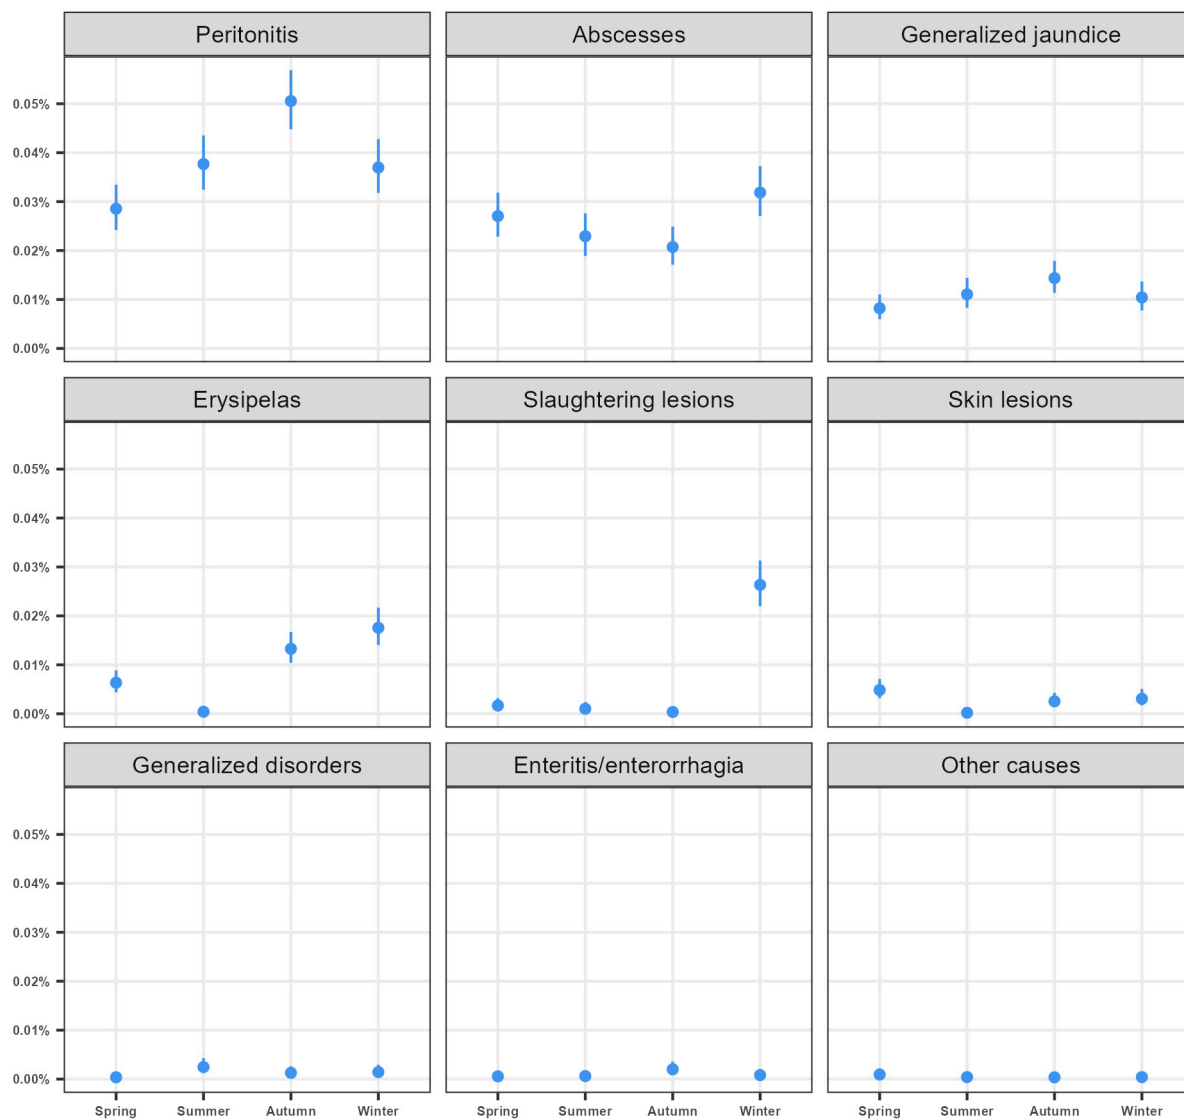

**Figure S2.**

Proportions with exact confidence interval about post-mortem carcass condemnations. Meteorological season were extracted from date of slaughtering and defined as follows: spring from March 1st to May 31, summer from June 1st to August 31st, autumn from September 1st to November 30st, winter from December 1st to February 28st.
